# Supplementary material for: Measles Virus-Based Treatments Trigger a Pro-inflammatory Cascade and a Distinctive Immunopeptidome in Glioblastoma
Source: PubMed Central journal article supplement — Mol Ther Oncolytics. 2018 Dec 31;12:147–61. doi: 10.1016/j.omto.2018.12.010 (PMC6365369; doi:10.1016/j.omto.2018.12.010), 2018-12-31
Supplement: mmc1.pdf [file mmc1.pdf]

## **Supplemental Information**

### **Measles Virus-Based Treatments Trigger a Pro-inflammatory Cascade and a Distinctive Immuno-peptidome in Glioblastoma**

**Srinath Rajaraman, Denis Canjuga, Michael Ghosh, Marius Cosmin Codrea, Raika Sieger, Florian Wedekink, Marcos Tatagiba, Marilin Koch, Ulrich M. Lauer, Sven Nahsen, Hans-Georg Rammensee, Michael D. Mühlebach, Stefan Stevanovic, and Ghazaleh Tabatabai**

Supplemental Information

Supplemental Figures

Supplemental Figure S1

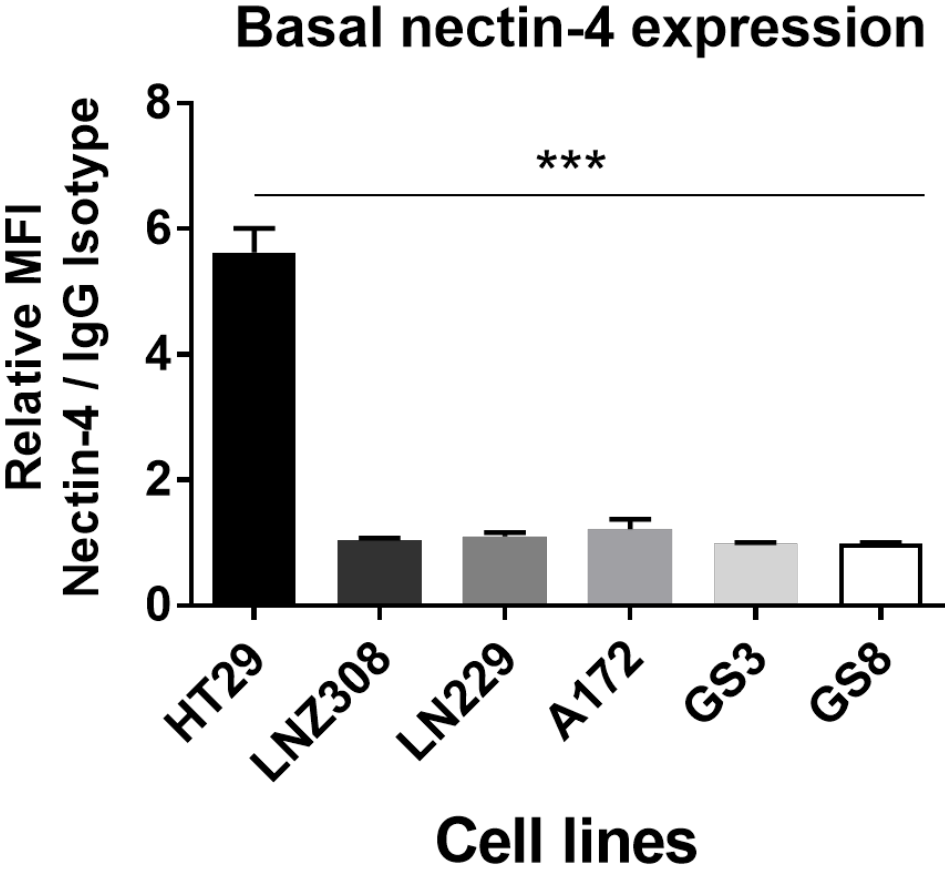

Supplemental Figure S2

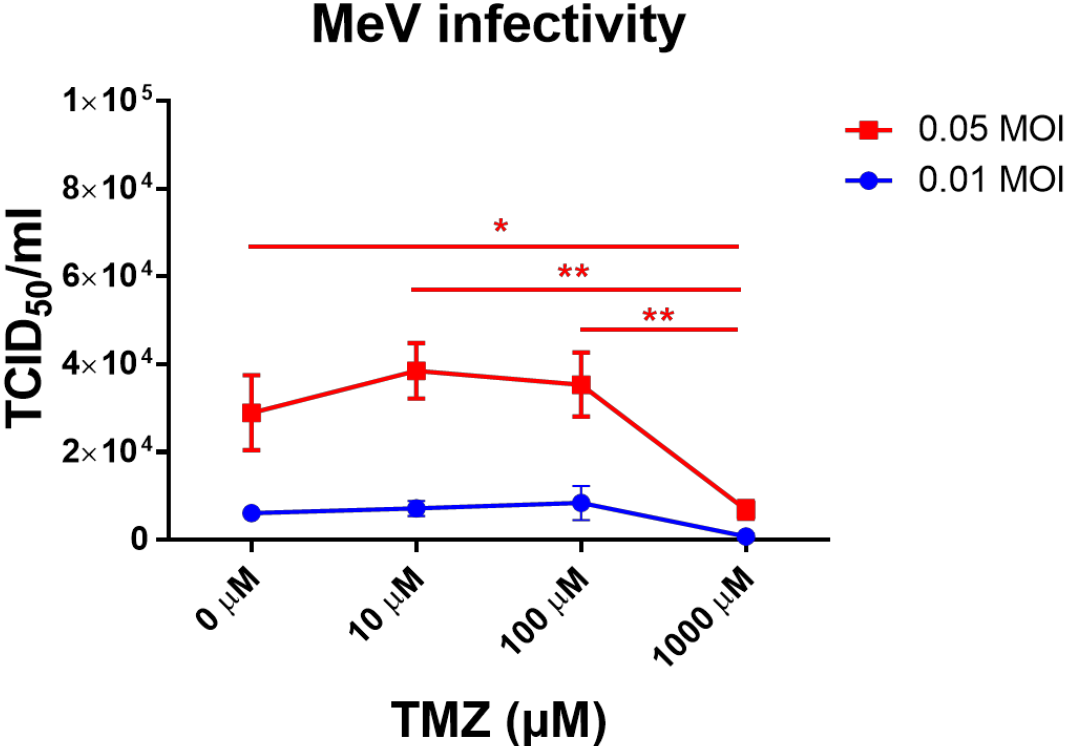

Supplemental Figure S3

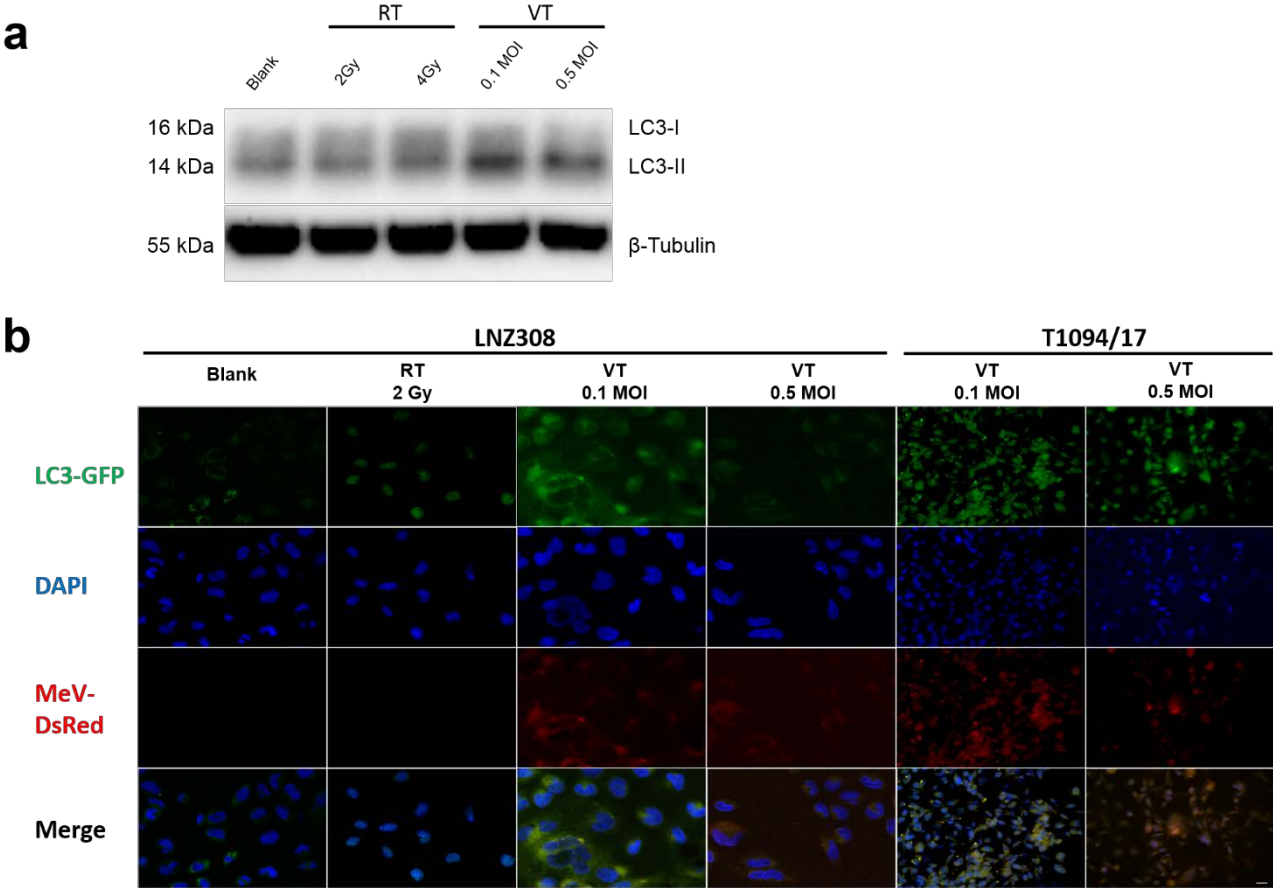

Supplemental Figure S4

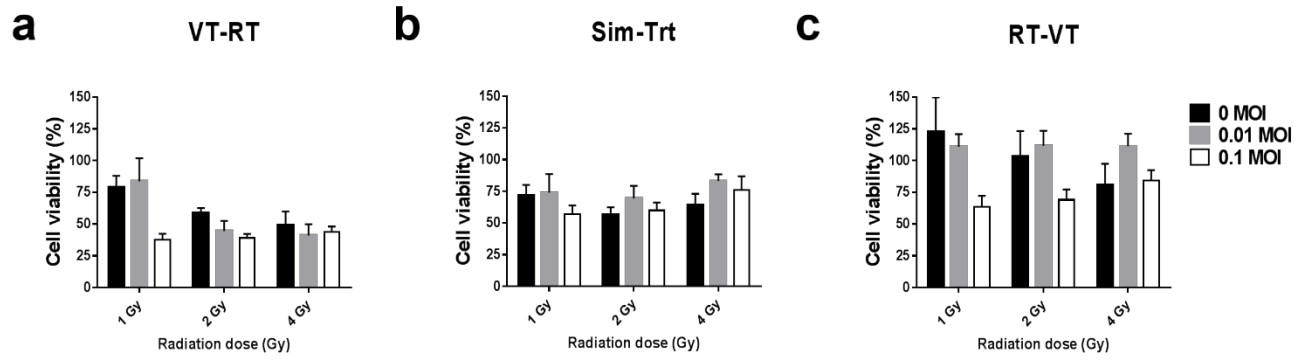

Supplemental Figure S5

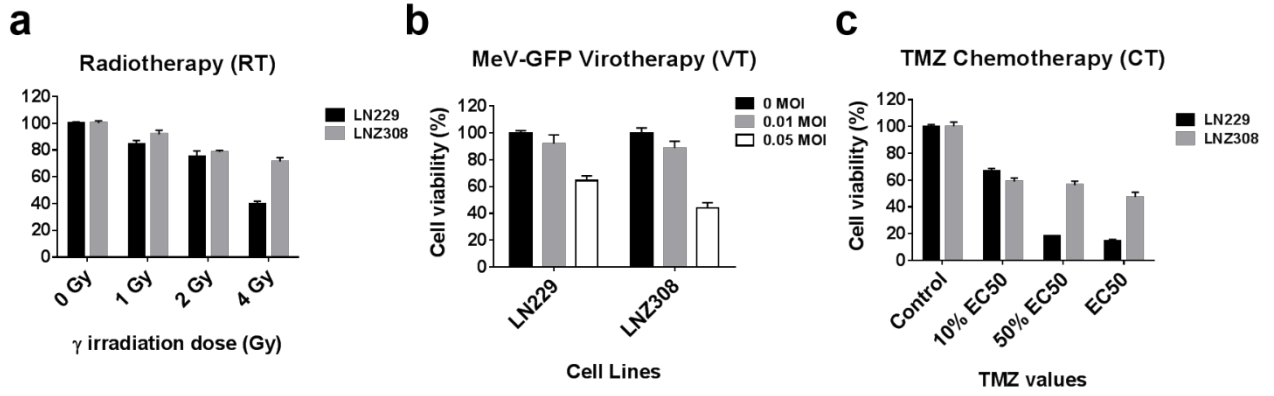

Supplemental Figure S6

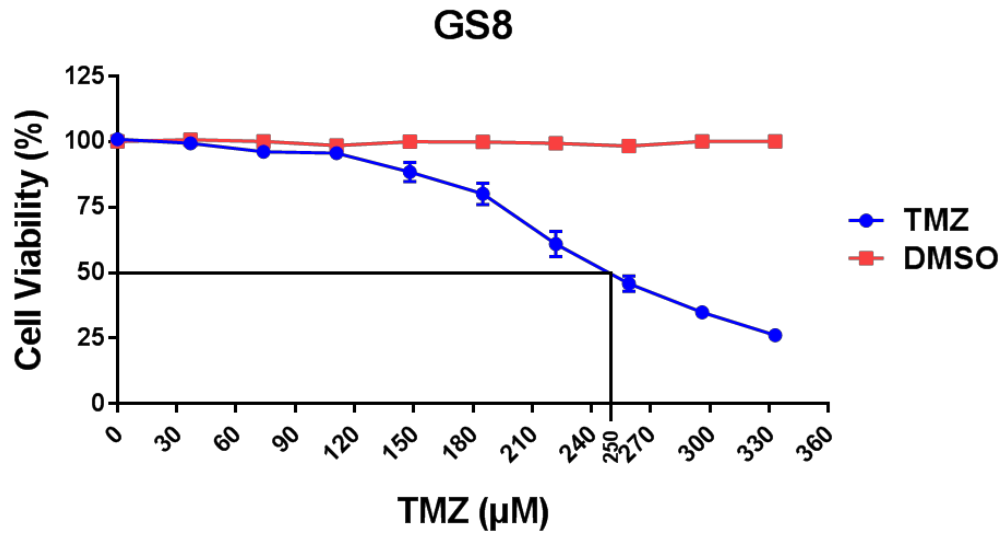

Supplemental Figure S7

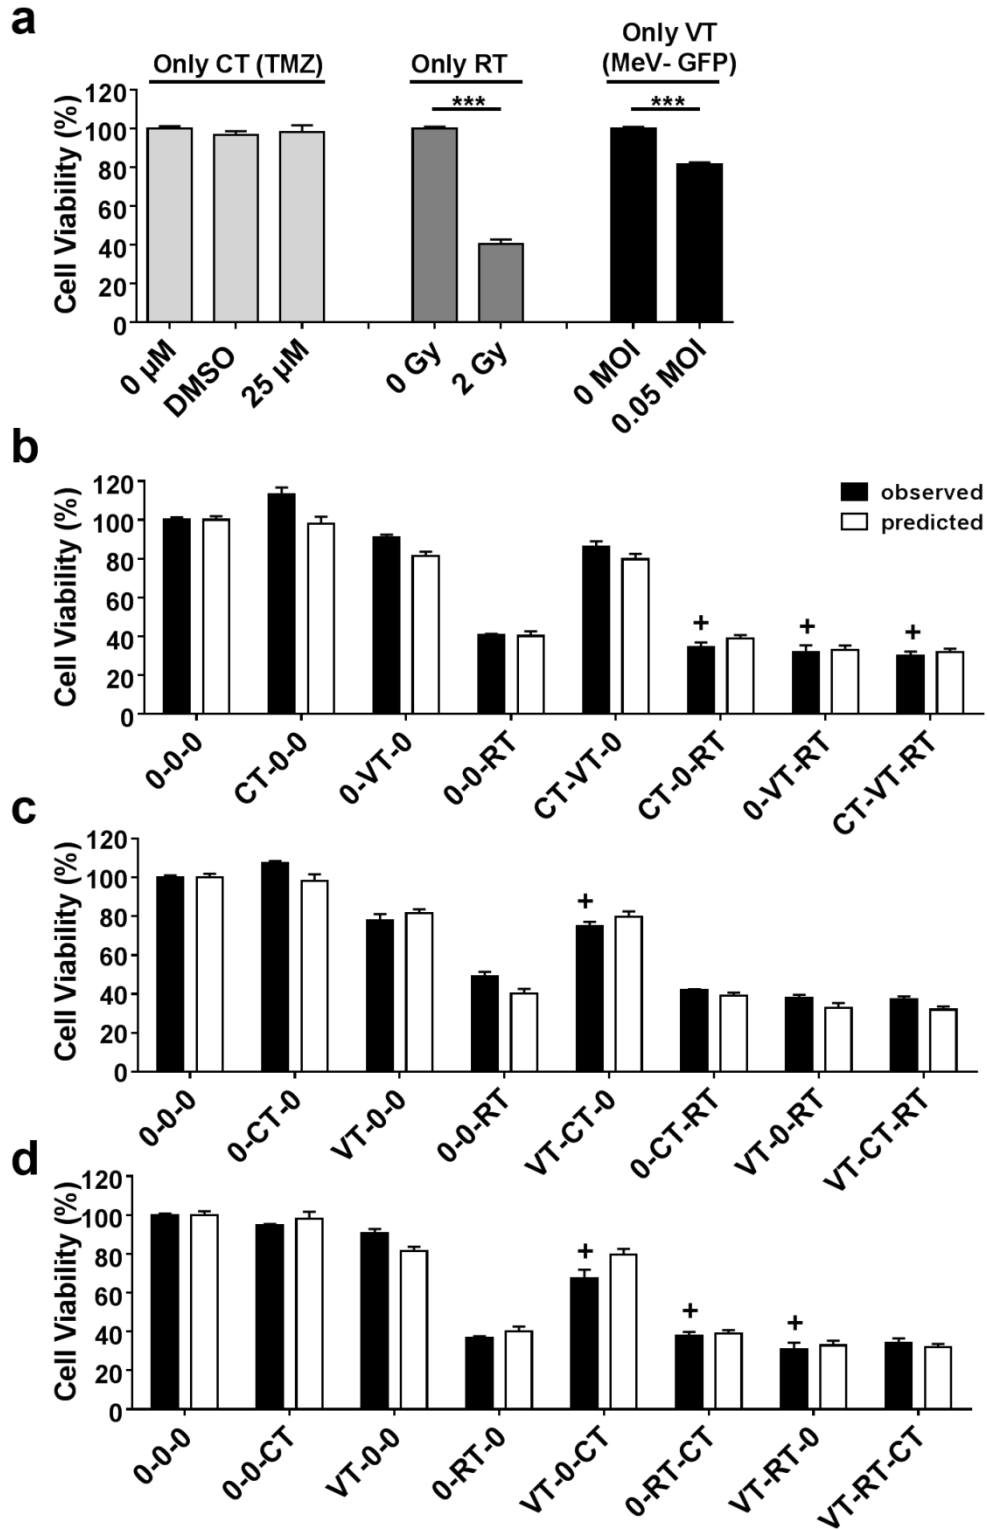



Supplemental Figure S8

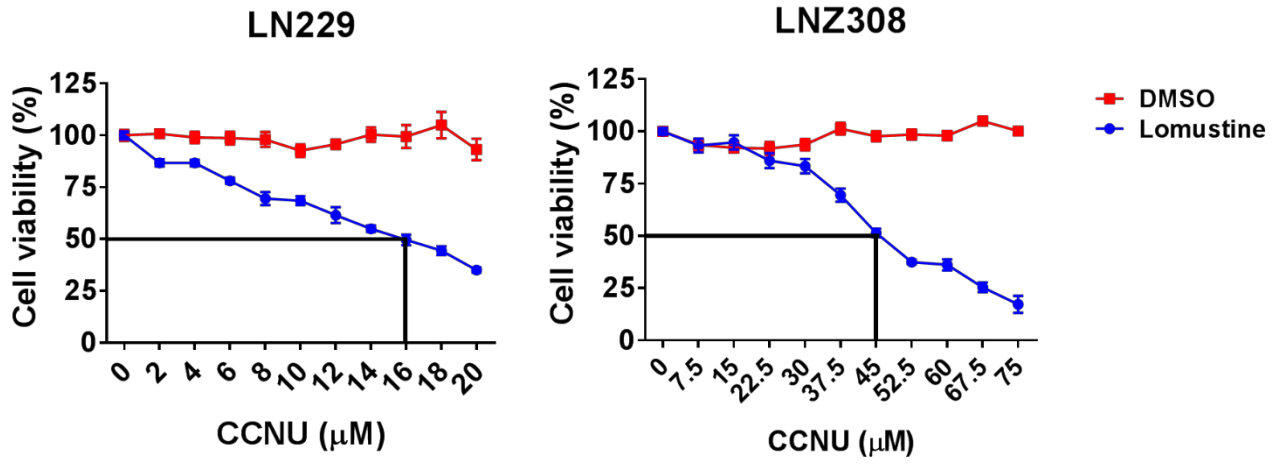

Supplemental Figure S9

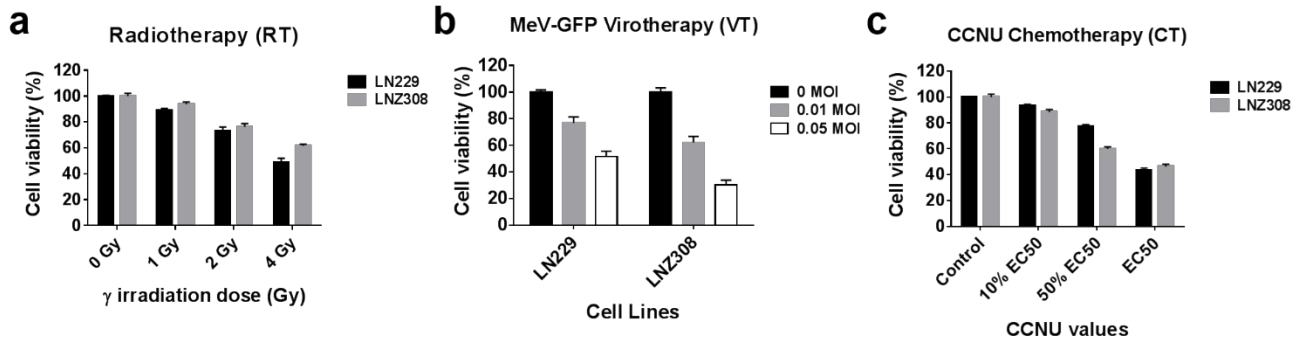

Supplemental Figure S10

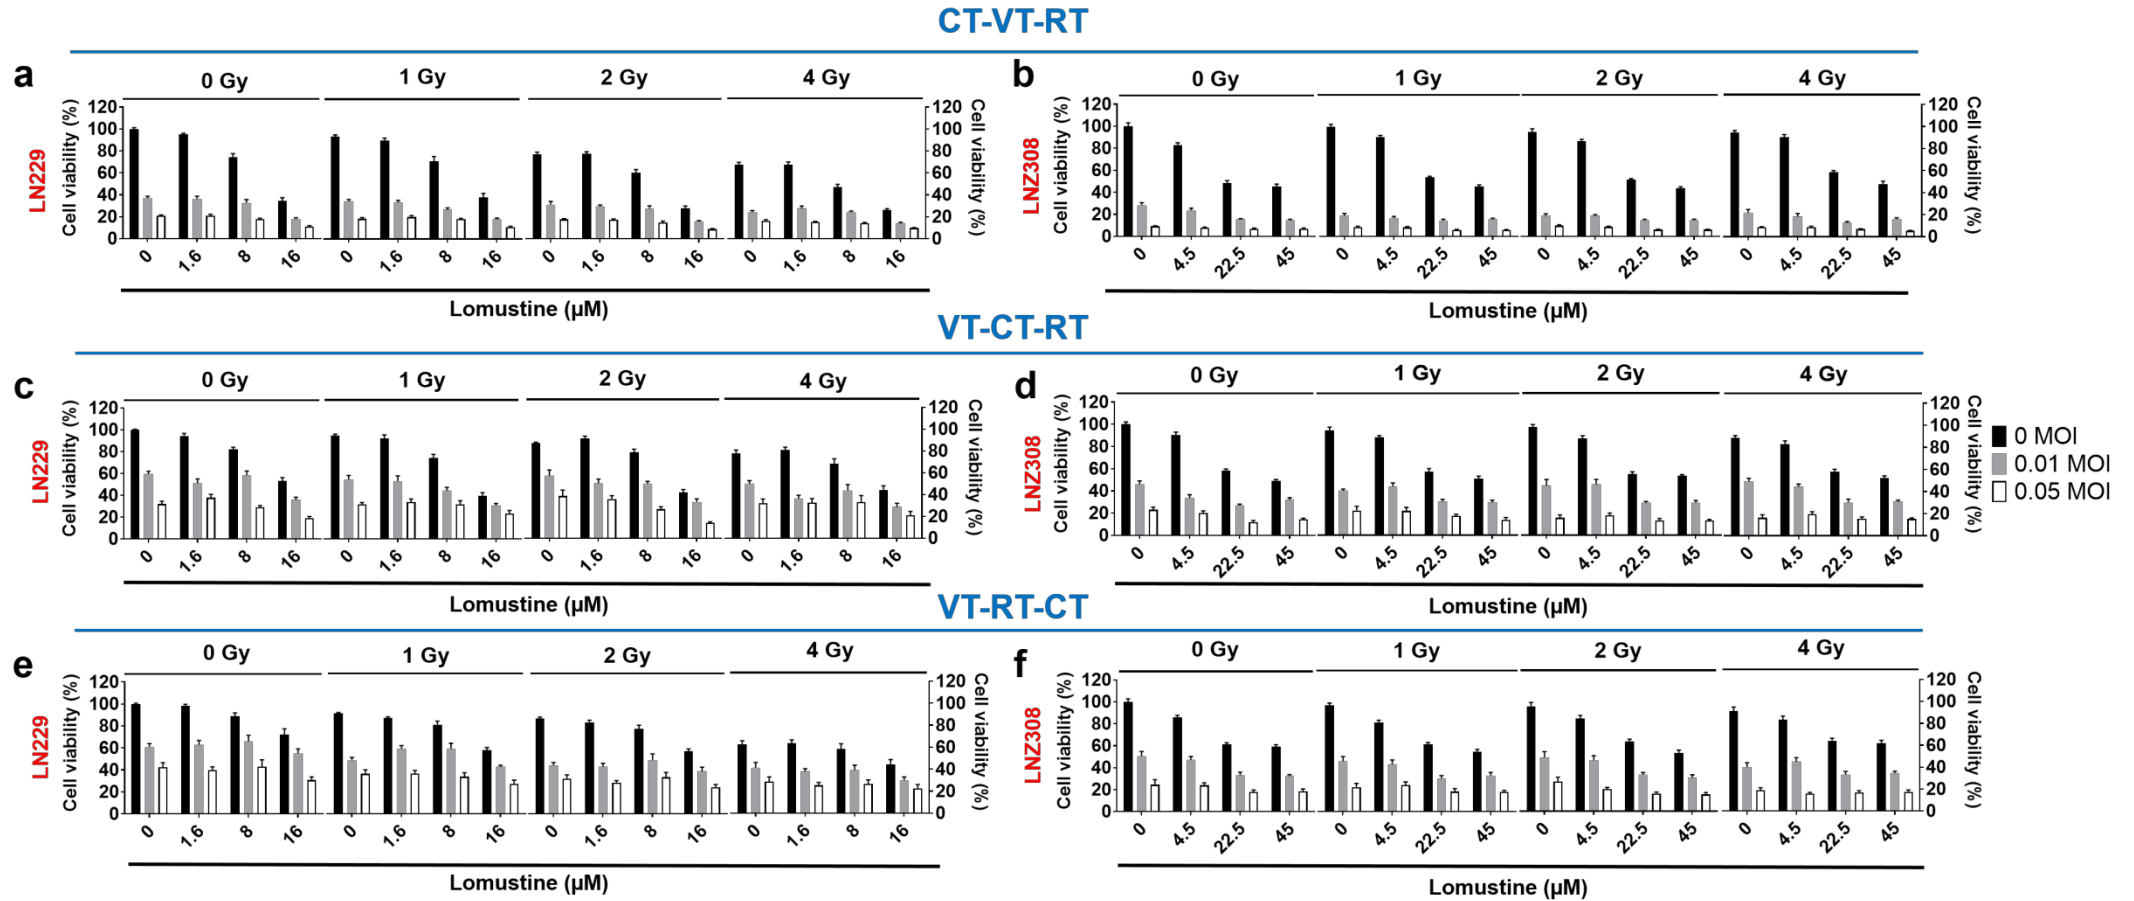

Supplemental Figure S11

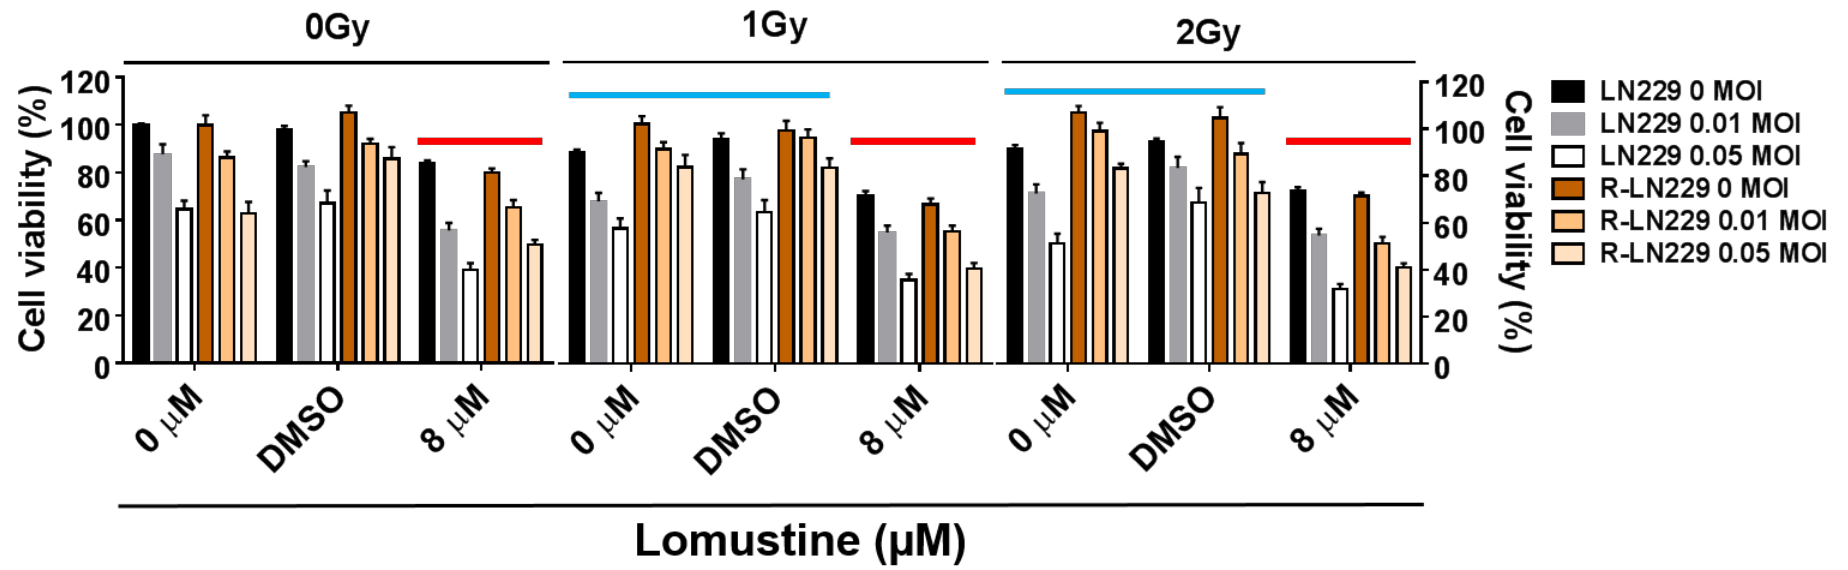

Supplemental Figure S12

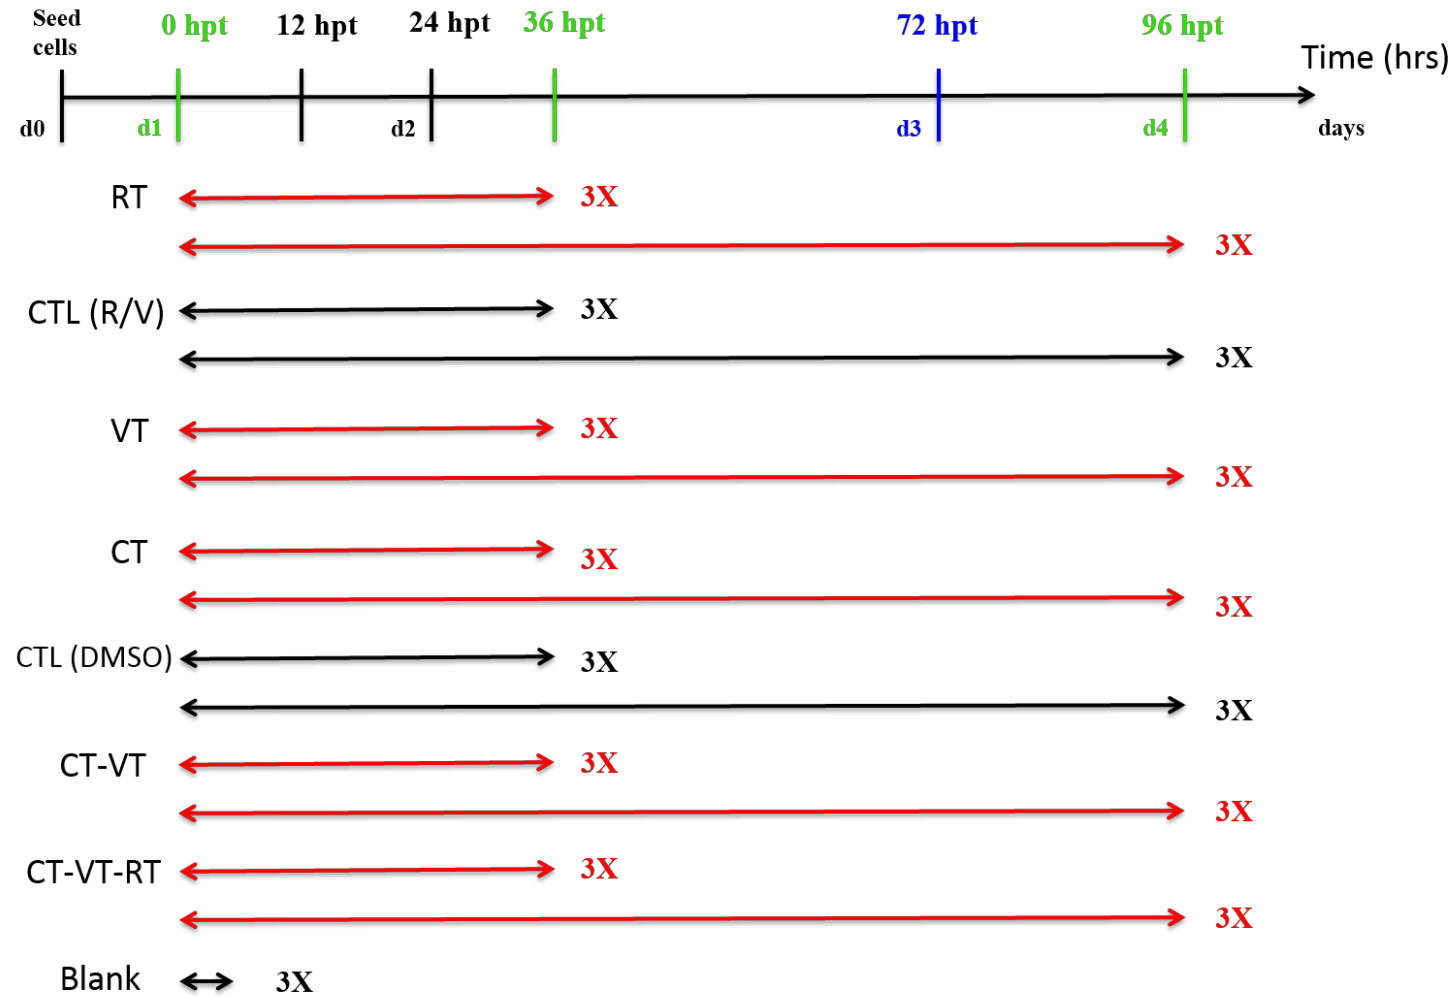



Supplemental Figure S14

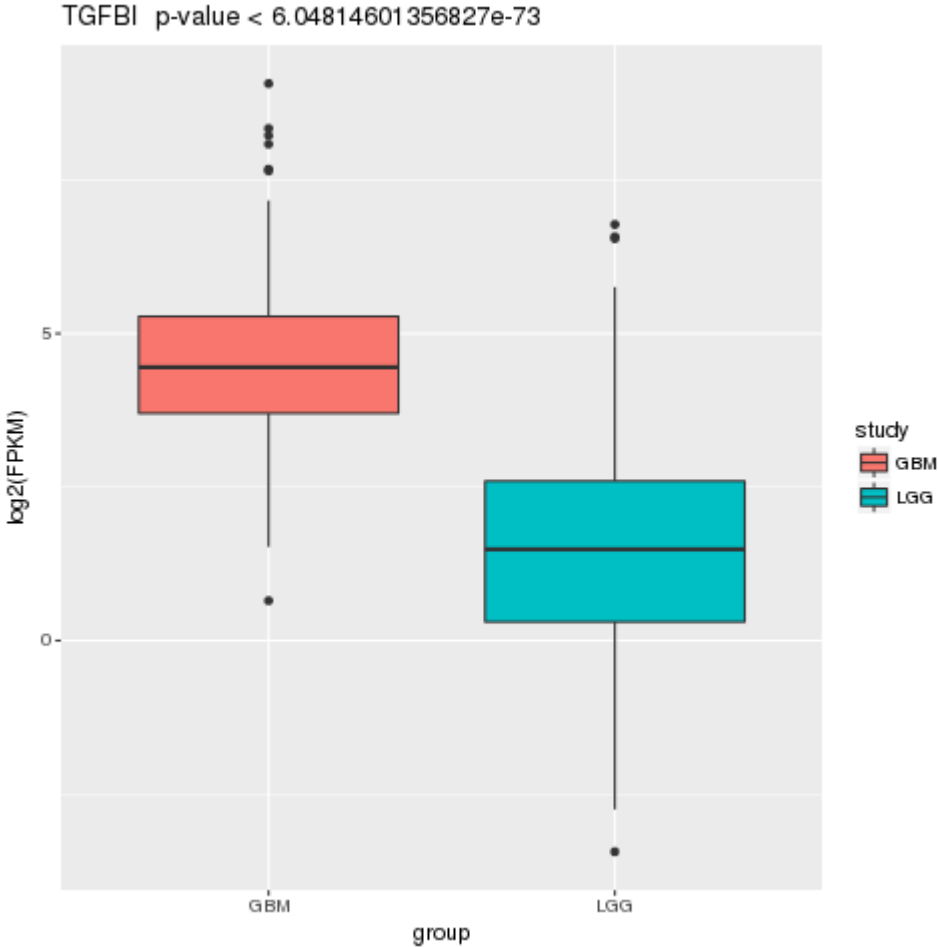

## Supplemental Figure Legends

**Supplemental Figure S1: Nectin-4 expression in glioma cells.** No basal nectin-4 expression was observed in glioma cells and glioma stem-like cells as determined via flow cytometry along with positive control HT-29 cells, a nectin-4<sup>+</sup> colorectal adenocarcinoma cell line. Receptor expression depicted as relative MFI compared to isotype control and expressed as Mean  $\pm$  SEM, n = 3. One-way ANOVA with Dunnett's multiple comparison test; \*, p < 0.05; \*\*, p < 0.01; \*\*\*, p < 0.001.

**Supplemental Figure S2: Measles viral infectivity post TMZ treatment in LNZ308 glioma cells.** MeV infectivity increased after treatment with doses of 10  $\mu$ M and 100  $\mu$ M TMZ while significant decrease in viral titers were observed post treatment with 1000  $\mu$ M TMZ in LNZ308 at a viral dose of 0.05 MOI. Minimal differences in viral infectivity were noticed upon TMZ treatment at a lower viral dose of 0.01 MOI. Two-way ANOVA with Tukey's multiple comparison test; \*, p < 0.05; \*\*, p < 0.01. Data expressed as Mean  $\pm$  SEM, n = 3.

**Supplemental Figure S3: Induction of autophagy upon MeV infection. a,** Immunoblot analyses reveals conversion of LC3-I to LC3-II (upper panel) upon MeV infection (VT) in contrast to radiotherapy (RT);  $\beta$ -tubulin served as loading control (lower panel). **b,** VT initiates autophagic flux as demonstrated by an increased GFP-tagged LC3 expression in LNZ308 and primary GBM T1094/17 cells while basal expression seen in Blank untreated cells and upon radiotherapy (RT).

**Supplemental Figure S4: Virotherapy followed by irradiation (VT-RT) is more efficient than other regimen in LN229.** Cell viabilities assessed post sequential treatments with MeV and VT in **a,** VT-RT showing maximal synergistic potency in comparison to **b,** Simultaneous treatment (Sim-Trt) of MeV with RT or **c,** RT followed by VT, which shows less cytotoxic efficacy. Black, grey and white bars indicate viral doses in indicated multiplicity of infection (MOI) of 0, 0.01 or 0.1. Data expressed as Mean  $\pm$  SEM, n = 6.



**Supplemental Figure S5: Monotherapies using RT, MeV or TMZ.** LN229 and LN2308 cells were treated with monotherapies of **a**,  $\gamma$ -irradiation (RT), **b**, MeV virotherapy (VT) or **c**, TMZ chemotherapy (CT). The cell viability post monotherapies were used to calculate predicted values of combinatorial treatment using Chou-Talalay fractional product method. Data expressed as Mean  $\pm$  SEM, n = 9.

**Supplemental Figure S6: Determination of EC<sub>50</sub> value of TMZ for GS8 cells.** Depicted is the survival of GS8 cells incubated with different concentrations of TMZ. The EC<sub>50</sub> for GS8 was identified to be 250  $\mu$ M, employing appropriate solvent (DMSO) controls. TMZ and DMSO are depicted by blue and red dose-response curves respectively. Data expressed as Mean  $\pm$  SEM, n = 9.

**Supplemental Figure S7: Cytotoxic survival assay in GS8 using TMZ as alkylating agent in combination with VT or RT.** **a**, Monotherapies with TMZ (CT),  $\gamma$ -irradiation (RT), or MeV (VT). **b - d**, Black bars indicate observed values and white bars indicate calculated predicted values in the corresponding permuted regimen. Regimen marked with "0" in a certain position of the sequence indicate absence of this respective treatment modality, while CT = 25  $\mu$ M, VT = 0.05 MOI, RT = 2 Gy were employed at the pre-determined sequence of that respective regimen. For example, in CT-0-RT, no virus was used, while TMZ concentration in CT was 25  $\mu$ M, and cells were irradiated for RT with a dose of 2 Gy. Similarly, the sequence of treatments is indicated in each regimen, e.g. VT-x-x indicates a regimen initiated with VT, while x-VT-x indicates that virotherapy came second 12 h after the first treatment in this respective protocol. Thereby, we can visualize all observed monotherapies, dual therapies, and triple therapies with '+' indicating synergy when comparing observed vs. predicted cytotoxicity. **b**, CT-VT-RT is the only regimen to elicit synergy as a triple regimen, while **d**, the sequence VT-RT-CT revealed synergy in dual therapies, but not as a triple regimen. Data expressed as Mean  $\pm$  SEM, n = 9.

**Supplemental Figure S8: Determination of EC<sub>50</sub> value of lomustine (CCNU) for LN229 and LN2308 cells.** Depicted is the survival of LN229 or LN2308 cells incubated with different concentrations of CCNU. Cell viability of LN229 or LN2308 cells after incubation with different concentrations of CCNU or DMSO (control). The EC<sub>50</sub> for LN229 and LN2308 were identified to be

16  $\mu\text{M}$  and 45  $\mu\text{M}$ , respectively. Blue line indicates cell viability post CCNU, while red line depicts viability under DMSO control treatment. Data expressed as Mean  $\pm$  SEM, n = 6.

**Supplemental Figure S9: Monotherapies using lomustine (CCNU) as alkylating agent.** LN229 and LNZ308 cells were treated with monotherapies of **a**,  $\gamma$ -irradiation (RT), **b**, MeV virotherapy (VT), and **c**, CCNU chemotherapy (CT). The cell viability post monotherapies were used to calculate predicted values of combinatorial treatment using fractional product method. Data expressed as Mean  $\pm$  SEM, n = 9.

**Supplemental Figure S10: Anti-glioma effect of CT-VT-RT using CCNU as chemotherapeutic agent.** CT-VT-RT is synergistic in **a**, LN229 and **b**, LNZ308 cells. VT-CT-RT showed poor combinatorial efficacy in **c**, LN229 and **d**, LNZ308 cells. Similarly, regimen VT-RT-CT exhibited poor combinatorial efficacy in **e**, LN229 and **f**, in LNZ308. Data expressed as Mean  $\pm$  SEM, n = 9.

**Supplemental Figure S11: Anti-glioma activity of CT-VT-RT in TMZ-resistant cells (R-LN229) using CCNU as alkylating agent.** Black, grey, and white bars indicate cell viability post CT-VT-RT treatment in parental LN229 cells. Orange and brown bars indicate cell viability post CT-VT-RT treatment in temozolomide-resistant R-LN229 cells. Addition of CCNU rescued the resistant effect (red lines) in synergistic regimen as opposed to aggressive proliferative effect (blue lines) in the absence of CCNU (0  $\mu\text{M}$  or DMSO) with increasing doses of  $\gamma$ -irradiation. Abbreviations: Prd, predicted. Data expressed as Mean  $\pm$  SEM, n = 9.

**Supplemental Figure S12: Schematic representation of treatments and time points of samples considered for RNASeq.** LNZ308 cells were treated with monotherapies (RT - 2 Gy, CT - 130  $\mu\text{M}$  TMZ, VT - 0.05 MOI), double regimen (CT-VT, 130  $\mu\text{M}$  TMZ - 0.05 MOI) and synergistic triple regimen (CT-VT-RT, 130  $\mu\text{M}$  TMZ - 0.05 MOI - 2 Gy) along with CTL (DMSO) as control for CT initiated regimens and CTL (R/V) serving as control for RT and VT regimens. Blank (0 hpt) was used as basal control for expression. RNA and protein lysates were harvested at 0 hpt, 36 hpt, 72 hpt, and 96 hpt post respective treatments. Only time points marked in green were further processed for RNA sequencing (0 hpt, 36 hpt, and 96 hpt) as indicated with double-headed arrows. Samples at time-point

72 hpt (in blue) were collected, but solely used for validation of transcriptome data. “3X” indicate that all treatments were carried out in biological triplicates.

**Supplemental Figure S13: Delayed STAT1 signaling augmenting efficient viral proliferation in CT-VT-RT.** Immunoblot analyses reveal viral proliferation as observed with MeV nucleocapsid (N) expression (upper panel) in all VT-containing regimens and similar expression in CT-VT-RT at 72 hpt despite viral infection 12 h later than VT alone; while  $\beta$ -tubulin served as loading control (lower panel).

**Supplemental Figure S14: Expression profile of TGFBI analysed in TCGA dataset.** TGFBI was significantly overexpressed in glioblastoma patients (GBM) in comparison to patients with low grade gliomas (LGG). The TGFBI expression represented in terms of  $\log_2$  (FPKM). Abbreviations: FPKM, fragments per kilobase of transcript per Million mapped reads. p-value:  $6.04 \times 10^{-73}$ .

## Supplemental Tables

**Supplemental Table ST1: Table depicting synergy observed with CT-VT-RT regimen in LN229 including 2 Gy radiation.** Synergy is depicted with “+”, antagonism with “-” and additive effect as “0”. (Abbreviations: CT, chemotherapy; GFP, green fluorescent protein; MeV, measles virus; MOI, multiplicity of infection; RT, radiotherapy; TMZ, temozolomide; VT, virotherapy)

| <b>CT-VT-RT<br/>LN229</b> |              | <b>VT (MeV-GFP)</b>      |                           |                                      |                          |                           |                                      |                          |                           |                                      |
|---------------------------|--------------|--------------------------|---------------------------|--------------------------------------|--------------------------|---------------------------|--------------------------------------|--------------------------|---------------------------|--------------------------------------|
| <b>RT<br/>2 Gy</b>        |              | <b>0 MOI</b>             |                           |                                      | <b>0.01 MOI</b>          |                           |                                      | <b>0.05 MOI</b>          |                           |                                      |
|                           |              | <b>Mean<br/>Observed</b> | <b>Mean<br/>Predicted</b> | <b>Synergy<br/>/Anta-<br/>gonism</b> | <b>Mean<br/>Observed</b> | <b>Mean<br/>Predicted</b> | <b>Synergy<br/>/Anta-<br/>gonism</b> | <b>Mean<br/>Observed</b> | <b>Mean<br/>Predicted</b> | <b>Synergy<br/>/Anta-<br/>gonism</b> |
| <b>CT<br/>(TMZ)</b>       | <b>0 μM</b>  | 76.13                    | 75.08                     | 0                                    | 52.85                    | 69.04                     | +                                    | 35.49                    | 47.86                     | +                                    |
|                           | <b>9 μM</b>  | 48.44                    | 49.68                     | +                                    | 34.72                    | 45.30                     | +                                    | 19.62                    | 31.69                     | +                                    |
|                           | <b>45 μM</b> | 13.47                    | 13.36                     | 0                                    | 11.81                    | 12.35                     | +                                    | 6.97                     | 8.56                      | +                                    |
|                           | <b>90 μM</b> | 12.40                    | 10.81                     | 0/-                                  | 10.93                    | 9.91                      | 0/-                                  | 7.45                     | 6.83                      | 0                                    |

**Supplemental Table ST2: Table detailing calculation with low synergy potential observed in LN229 treated including VT-CT-RT at 2 Gy radiation. Synergy is depicted with “+”, antagonism with “-” and additive effect as “0”. (Abbreviations: CT, chemotherapy; GFP, green fluorescent protein; MeV, measles virus; MOI, multiplicity of infection;**

**RT, radiotherapy; TMZ, temozolomide; VT, virotherapy)**

| <b>VT-CT-RT<br/>LN229</b> |              | <b>VT (MeV-GFP)</b>      |                           |                                      |                          |                           |                                      |                          |                           |                                      |
|---------------------------|--------------|--------------------------|---------------------------|--------------------------------------|--------------------------|---------------------------|--------------------------------------|--------------------------|---------------------------|--------------------------------------|
| <b>RT<br/>2 Gy</b>        |              | <b>0 MOI</b>             |                           |                                      | <b>0.01 MOI</b>          |                           |                                      | <b>0.05 MOI</b>          |                           |                                      |
|                           |              | <b>Mean<br/>Observed</b> | <b>Mean<br/>Predicted</b> | <b>Synergy<br/>/Anta-<br/>gonism</b> | <b>Mean<br/>Observed</b> | <b>Mean<br/>Predicted</b> | <b>Synergy<br/>/Anta-<br/>gonism</b> | <b>Mean<br/>Observed</b> | <b>Mean<br/>Predicted</b> | <b>Synergy<br/>/Anta-<br/>gonism</b> |
| <b>CT<br/>(TMZ<br/>)</b>  | <b>0 μM</b>  | 84.74                    | 75.08                     | -                                    | 62.81                    | 69.04                     | +                                    | 35.98                    | 47.86                     | +                                    |
|                           | <b>9 μM</b>  | 62.57                    | 49.68                     | -                                    | 48.95                    | 45.30                     | -                                    | 35.37                    | 31.69                     | -                                    |
|                           | <b>45 μM</b> | 25.78                    | 13.36                     | -                                    | 22.65                    | 12.35                     | -                                    | 15.24                    | 8.56                      | -                                    |
|                           | <b>90 μM</b> | 22.49                    | 10.81                     | -                                    | 21.52                    | 9.91                      | -                                    | 15                       | 6.83                      | -                                    |

**Supplemental Table ST3: Table detailing calculation with low synergy potential observed in LN229 treated with VT-RT-CT including 2 Gy radiation. Synergy is depicted with “+”, antagonism with “-” and additive effect as “0”. (Abbreviations: CT, chemotherapy; GFP, green fluorescent protein; MeV, measles virus; MOI, multiplicity of infection; RT, radiotherapy; TMZ, temozolomide; VT, virotherapy.)**

| <b>VT-RT-CT<br/>LN229</b> |                                 | <b>VT (MeV-GFP)</b>      |                           |                                      |                          |                           |                                      |                          |                           |                                                            |
|---------------------------|---------------------------------|--------------------------|---------------------------|--------------------------------------|--------------------------|---------------------------|--------------------------------------|--------------------------|---------------------------|------------------------------------------------------------|
| <b>RT<br/>2 Gy</b>        |                                 | <b>0 MOI</b>             |                           |                                      | <b>0.01 MOI</b>          |                           |                                      | <b>0.05 MOI</b>          |                           |                                                            |
|                           |                                 | <b>Mean<br/>Observed</b> | <b>Mean<br/>Predicted</b> | <b>Synergy<br/>/Anta-<br/>gonism</b> | <b>Mean<br/>Observed</b> | <b>Mean<br/>Predicted</b> | <b>Synergy<br/>/Anta-<br/>gonism</b> | <b>Mean<br/>Observed</b> | <b>Mean<br/>Predicted</b> | <b>Synergy<br/>/Anta-<br/>gonism/<br/>Anta-<br/>gonism</b> |
| <b>CT<br/>(TMZ<br/>)</b>  | <b>0 <math>\mu</math>M</b>      | 64.60                    | 75.08                     | +                                    | 48.32                    | 69.04                     | +                                    | 36.59                    | 47.86                     | +                                                          |
|                           | <b>9 <math>\mu</math>M</b>      | 55.60                    | 49.68                     | -                                    | 38.63                    | 45.30                     | +                                    | 34.33                    | 31.69                     | -                                                          |
|                           | <b>45<br/><math>\mu</math>M</b> | 25.68                    | 13.36                     | -                                    | 22.29                    | 12.35                     | -                                    | 14.12                    | 8.56                      | -                                                          |
|                           | <b>90<br/><math>\mu</math>M</b> | 24.84                    | 10.81                     | -                                    | 24.25                    | 9.91                      | -                                    | 16.15                    | 6.83                      | -                                                          |

**Table ST4: Table depicting synergy observed with CT-VT-RT regimen in LNZ308 treated including 2 Gy radiation.** Synergy is depicted with “+”, antagonism with “-” and additive effect as “0”. (Abbreviations: CT, chemotherapy; GFP, green fluorescent protein; MeV, measles virus; MOI, multiplicity of infection; RT, radiotherapy; TMZ, temozolomide; VT, virotherapy.)

| <b>CT-VT-RT<br/>LNZ308</b> |                | <b>VT (MeV-GFP)</b>      |                           |                                      |                          |                           |                                      |                          |                           |                            |
|----------------------------|----------------|--------------------------|---------------------------|--------------------------------------|--------------------------|---------------------------|--------------------------------------|--------------------------|---------------------------|----------------------------|
| <b>RT<br/>2 Gy</b>         |                | <b>0 MOI</b>             |                           |                                      | <b>0.01 MOI</b>          |                           |                                      | <b>0.05 MOI</b>          |                           |                            |
|                            |                | <b>Mean<br/>Observed</b> | <b>Mean<br/>Predicted</b> | <b>Synergy<br/>/Anta-<br/>gonism</b> | <b>Mean<br/>Observed</b> | <b>Mean<br/>Predicted</b> | <b>Synergy<br/>/Anta-<br/>gonism</b> | <b>Mean<br/>Observed</b> | <b>Mean<br/>Predicted</b> | <b>Synergy/Anta-gonism</b> |
| <b>CT<br/>(TMZ<br/>)</b>   | <b>0 μM</b>    | 101.50                   | 78.97                     | -                                    | 79.47                    | 69.28                     | -                                    | 30.52                    | 34.33                     | +                          |
|                            | <b>130 μM</b>  | 68.52                    | 46.52                     | -                                    | 53.48                    | 40.64                     | -                                    | 11.79                    | 20.34                     | +                          |
|                            | <b>650 μM</b>  | 60.09                    | 44.52                     | -                                    | 35.92                    | 39.36                     | +                                    | 9.64                     | 19.15                     | +                          |
|                            | <b>1300 μM</b> | 48.66                    | 37.30                     | -                                    | 33.33                    | 32.60                     | 0                                    | 9.78                     | 16.18                     | +                          |

**ST5: Table detailing calculation with low synergy potential observed in LNZ308 treated with VT-CT-RT including 2 Gy radiation.** Synergy is depicted with “+”, antagonism with “-” and additive effect as “0”. (Abbreviations: CT, chemotherapy; GFP, green fluorescent protein; MeV, measles virus; MOI, multiplicity of infection; RT, radiotherapy; TMZ, temozolomide; VT, virotherapy.)

| <b>VT-CT-RT<br/>LNZ308</b> |                | <b>VT (MeV-GFP)</b>      |                           |                                      |                          |                           |                                      |                          |                           |                            |
|----------------------------|----------------|--------------------------|---------------------------|--------------------------------------|--------------------------|---------------------------|--------------------------------------|--------------------------|---------------------------|----------------------------|
| <b>RT<br/>2 Gy</b>         |                | <b>0 MOI</b>             |                           |                                      | <b>0.01 MOI</b>          |                           |                                      | <b>0.05 MOI</b>          |                           |                            |
|                            |                | <b>Mean<br/>Observed</b> | <b>Mean<br/>Predicted</b> | <b>Synergy<br/>/Anta-<br/>gonism</b> | <b>Mean<br/>Observed</b> | <b>Mean<br/>Predicted</b> | <b>Synergy<br/>/Anta-<br/>gonism</b> | <b>Mean<br/>Observed</b> | <b>Mean<br/>Predicted</b> | <b>Synergy/Anta-gonism</b> |
| <b>CT<br/>(TMZ<br/>)</b>   | <b>0 μM</b>    | 92.86                    | 78.97                     | -                                    | 71.99                    | 69.28                     | -                                    | 31.30                    | 34.33                     | +                          |
|                            | <b>130 μM</b>  | 67.82                    | 46.52                     | -                                    | 56.57                    | 40.64                     | -                                    | 25.70                    | 20.34                     | -                          |
|                            | <b>650 μM</b>  | 48.96                    | 44.52                     | -                                    | 45.10                    | 39.36                     | -                                    | 25.38                    | 19.15                     | -                          |
|                            | <b>1300 μM</b> | 41.80                    | 37.30                     | -                                    | 37.16                    | 32.60                     | -                                    | 32.19                    | 16.18                     | -                          |



**Table ST6: Table detailing calculation with low synergy observed in LNZ308 treated with VT-RT-CT including 2 Gy radiation. Synergy is depicted with “+”, antagonism with “-” and additive effect as “0”. (Abbreviations: CT, chemotherapy; GFP, green fluorescent protein; MeV, measles virus; MOI, multiplicity of infection; RT, radiotherapy; TMZ, temozolomide; VT, virotherapy.)**

| <b>VT-RT-CT<br/>LNZ308</b> |                               | <b>VT (MeV-GFP)</b>      |                           |                                      |                          |                           |                                      |                          |                           |                            |
|----------------------------|-------------------------------|--------------------------|---------------------------|--------------------------------------|--------------------------|---------------------------|--------------------------------------|--------------------------|---------------------------|----------------------------|
| <b>RT<br/>2 Gy</b>         |                               | <b>0 MOI</b>             |                           |                                      | <b>0.01 MOI</b>          |                           |                                      | <b>0.05 MOI</b>          |                           |                            |
|                            |                               | <b>Mean<br/>Observed</b> | <b>Mean<br/>Predicted</b> | <b>Synergy<br/>/Anta-<br/>gonism</b> | <b>Mean<br/>Observed</b> | <b>Mean<br/>Predicted</b> | <b>Synergy<br/>/Anta-<br/>gonism</b> | <b>Mean<br/>Observed</b> | <b>Mean<br/>Predicted</b> | <b>Synergy/Anta-gonism</b> |
| <b>CT<br/>(TMZ<br/>)</b>   | <b>0 <math>\mu</math>M</b>    | 93.95                    | 78.97                     | -                                    | 83.29                    | 69.28                     | -                                    | 30.60                    | 34.33                     | -                          |
|                            | <b>130 <math>\mu</math>M</b>  | 70.42                    | 46.52                     | -                                    | 56.76                    | 40.64                     | -                                    | 26.01                    | 20.34                     | -                          |
|                            | <b>650 <math>\mu</math>M</b>  | 60.38                    | 44.52                     | -                                    | 41.23                    | 39.36                     | -                                    | 23.52                    | 19.15                     | -                          |
|                            | <b>1300 <math>\mu</math>M</b> | 42.22                    | 37.30                     | -                                    | 40.11                    | 32.60                     | -                                    | 23.62                    | 16.18                     | -                          |

**Supplemental Table ST7**

| <b><u>Gene</u></b> | <b><u>Forward Primer (5'→3')</u></b> | <b><u>Reverse Primer (5'→3')</u></b> |
|--------------------|--------------------------------------|--------------------------------------|
| ARF1               | GACCACGATCCTCTACAAGC                 | TCCCACACAGTGAAGCTGATG                |
| DDX58              | AGACAAAGATGAAGAGAGCAGGA              | GCTCGGACATTGCTGAAGAAG                |
| HLA-A              | GAGTATTGGGACCAGGAGACA                | CGTCGCAGCCATACATTATCTG               |
| HLA-B              | TGAGATGGGAGCCGTCTTC                  | CTACACATCACAGCAGCGAC                 |
| IFIH1              | CGGATATAAAGAATGTAACATTGTTATC         | ATGAGCATACTCCTCTGGTTTCA              |
| IFIT1              | CCTCCTTGGGTTCGTCTACA                 | GGCTGATATCTGGGTGCCTA                 |
| IFN-β              | GTCTCCTCCAAATTGCTCTCC                | CAGTATTCAAGCCTCCCATTCA               |
| ISG15              | ATGGGCTGGGACCTGACG                   | GCCGATCTTCTGGGTGATC                  |
| MX1                | CGCTGGTGCTGAAACTGAAGA                | GCGATGGCATTCTGGGCTTTA                |
| MX2                | AGTTCAGAATGGAGCAGATGG                | ACCGAAGACTCATTACTGGGAA               |
| OAS1               | CACAGAACTACAGAGAGACTTC               | CAAGCATAGACCGTCAGGAG                 |
| OAS2               | GACTTCTCCCAACCTGGATAATG              | CTGTCAATCTGCTCTAGGAAGC               |
| STAT1              | CAGAACAGAGAACACGAGACCA               | GTTTCAGTGACATTCAGCAACTCTA            |
| TAP1               | AAAGACACTCAACCAGAAGGAG               | GCCCACCAATGTAGAGGATTC                |
